# Supplementary material
Source: Preprints.org preprint supplement (doi:10.20944/preprints202102.0598.v1)

**A**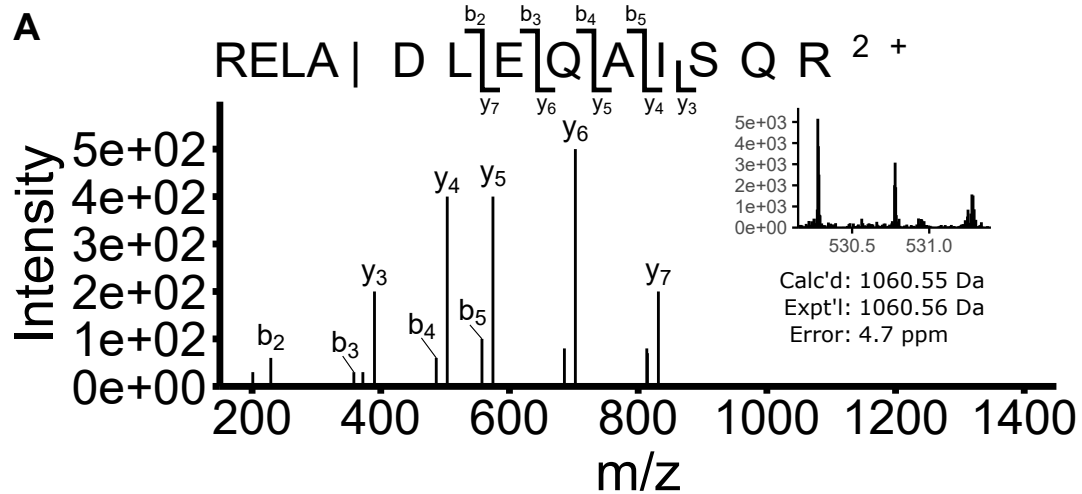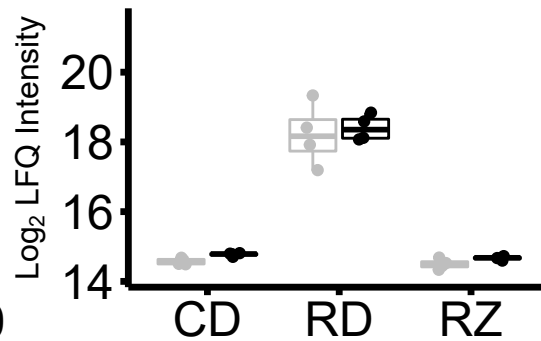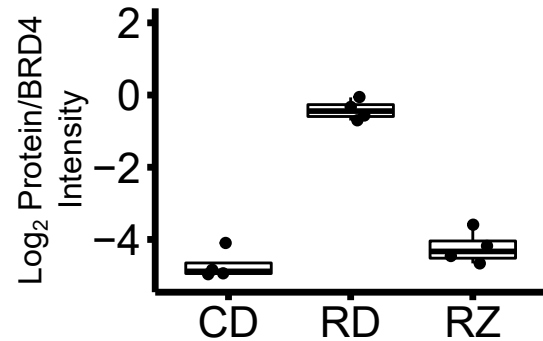**B**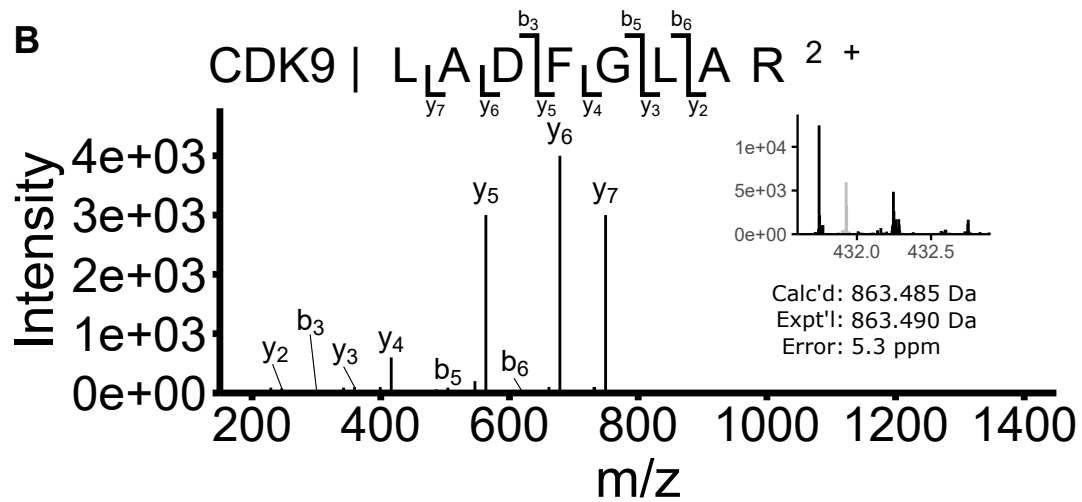

Supplement: Supplementary file 1 [file supplementary]

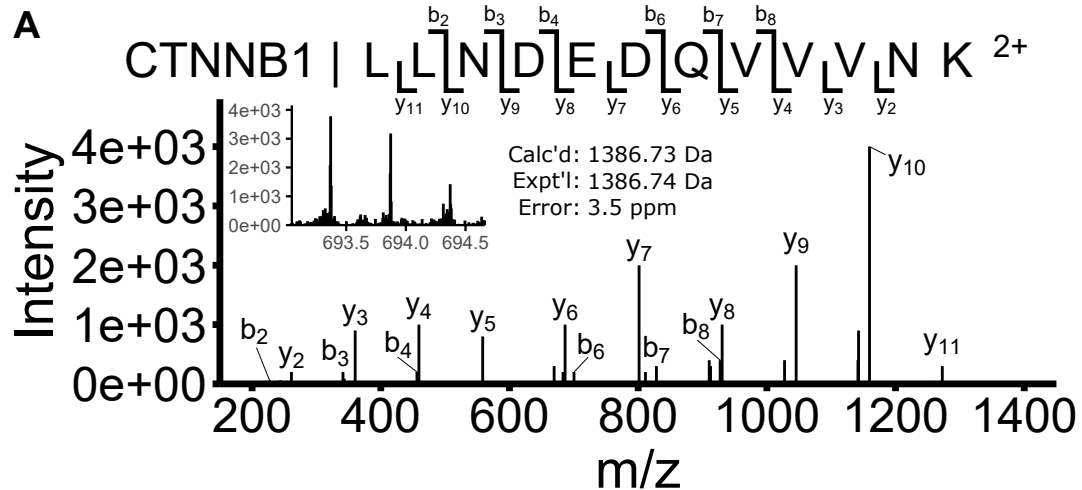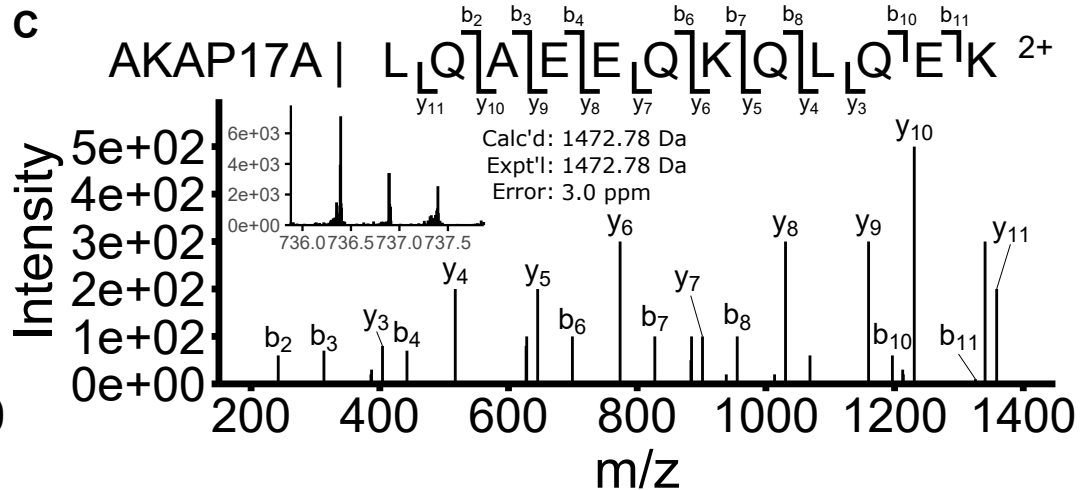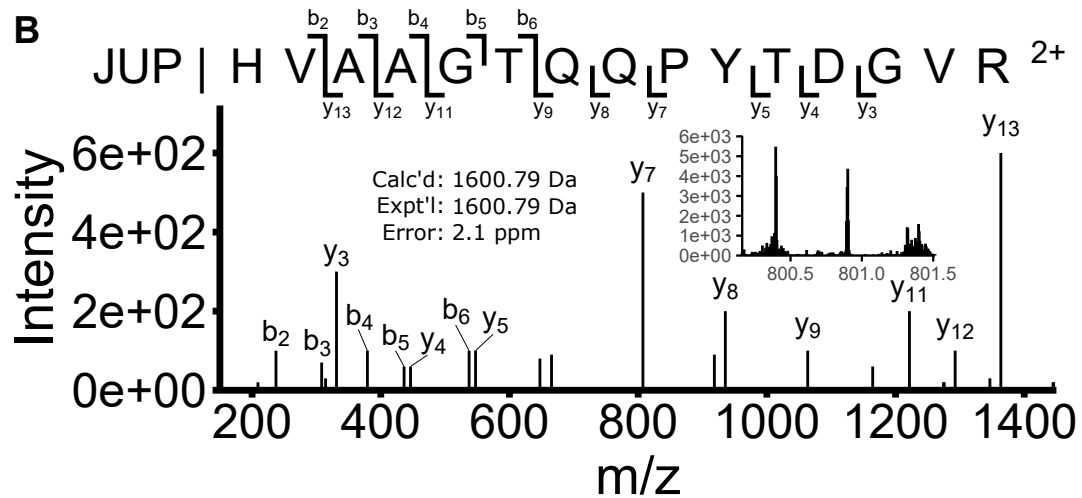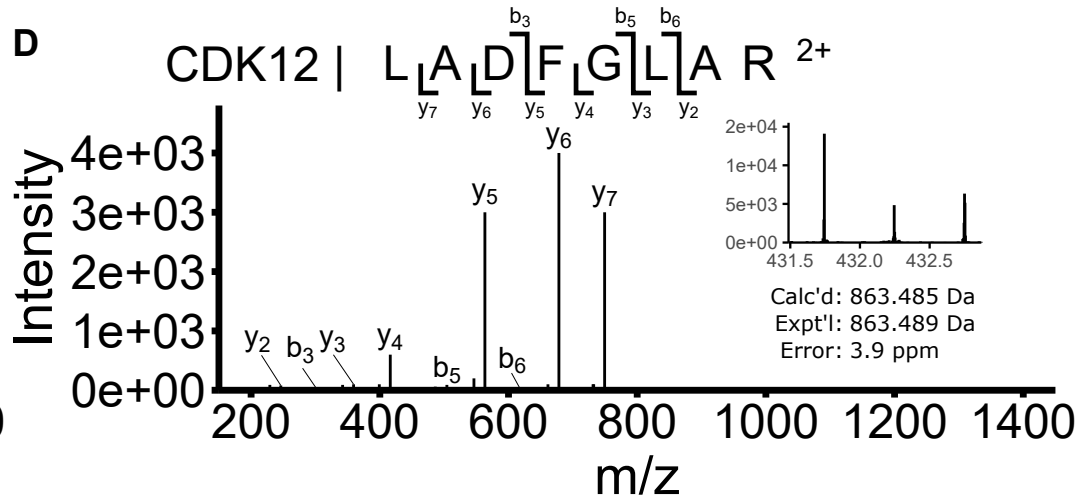

Supplement: Supplementary file 2 [file supplementary]

**A**

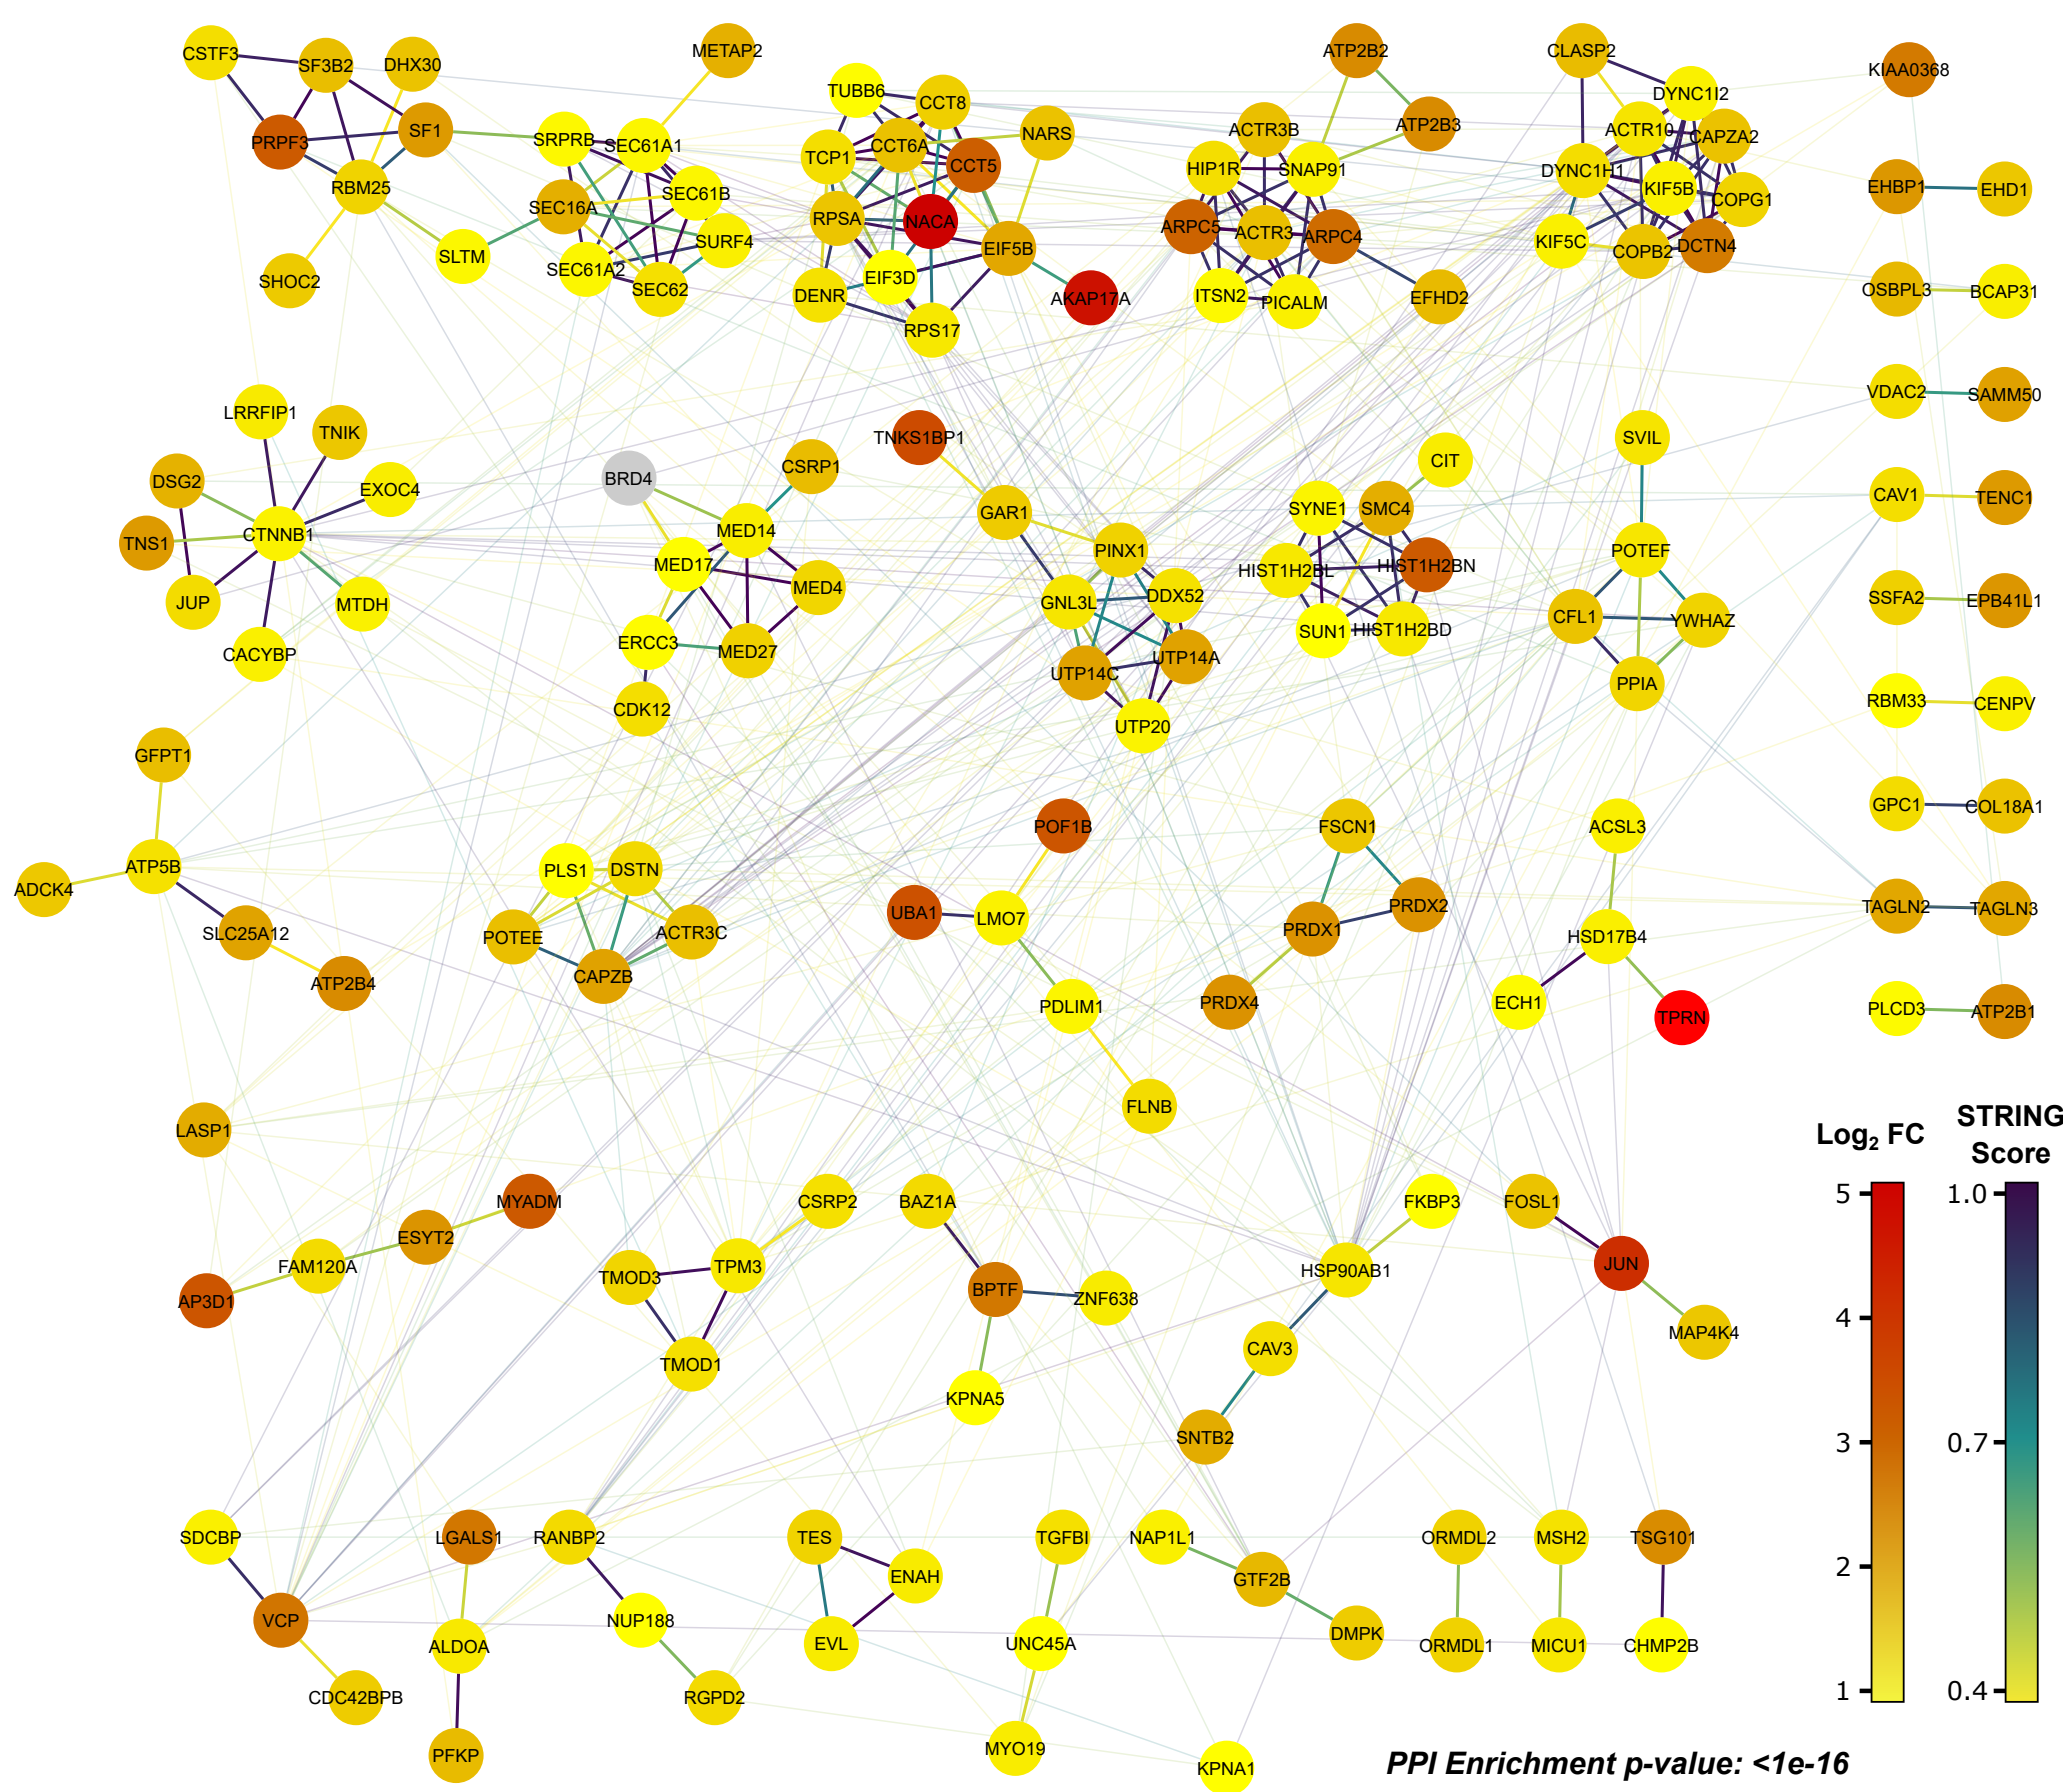

**B**

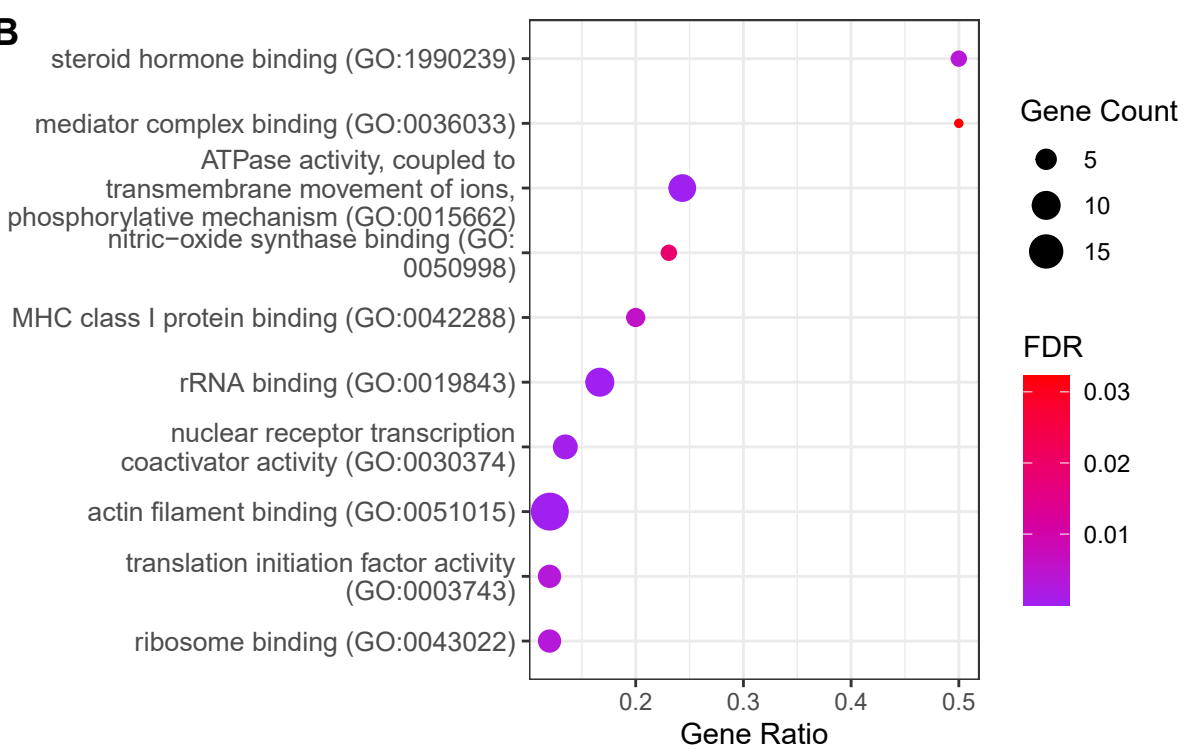

**C**

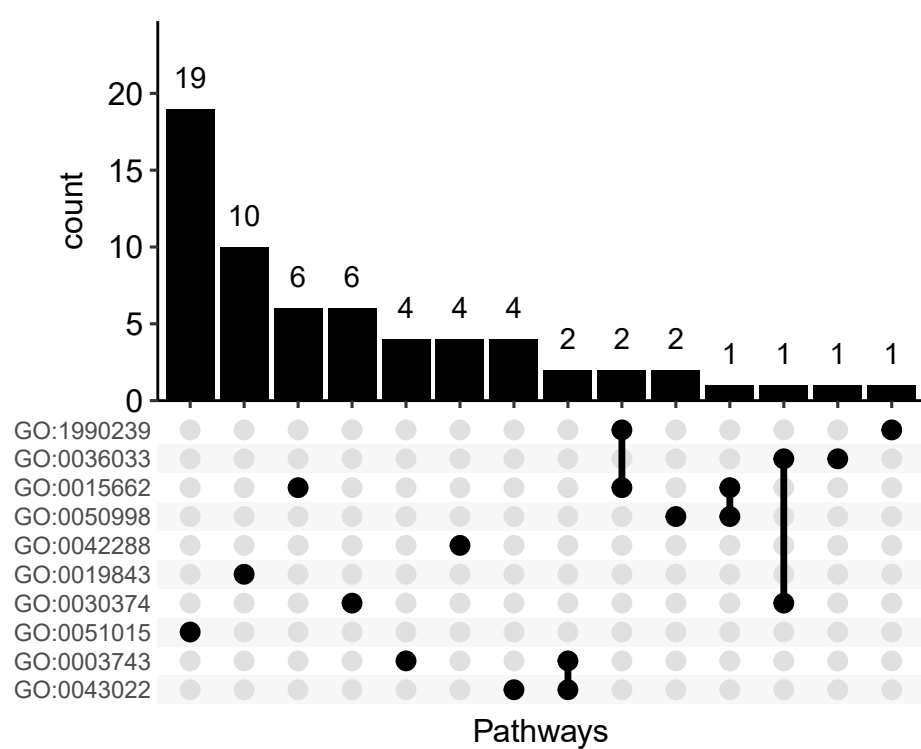

Supplement: Supplementary file 3 [file supplementary]

**A**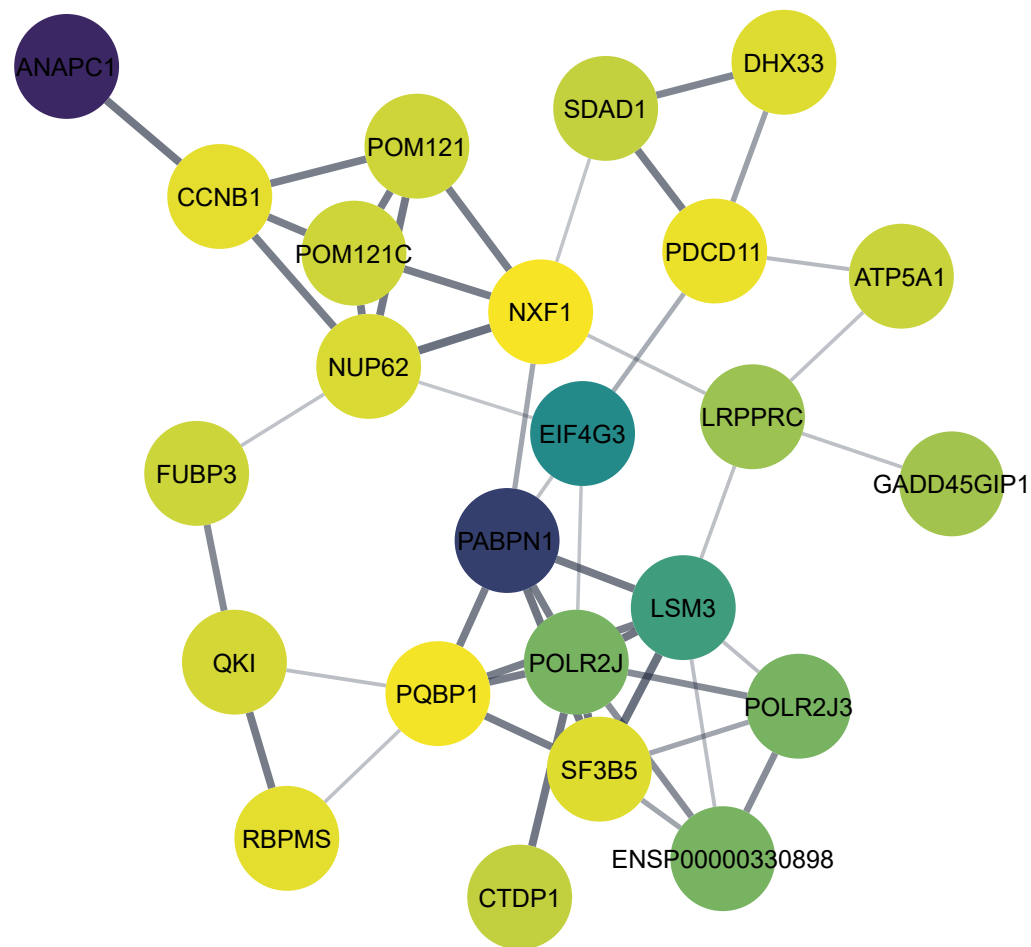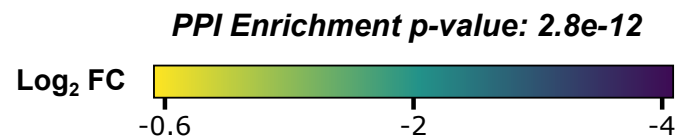**B**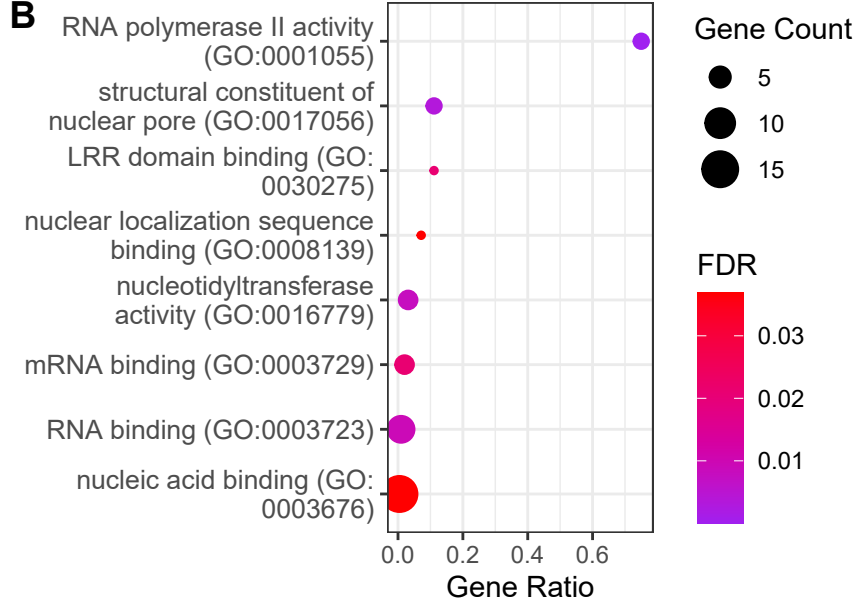**C**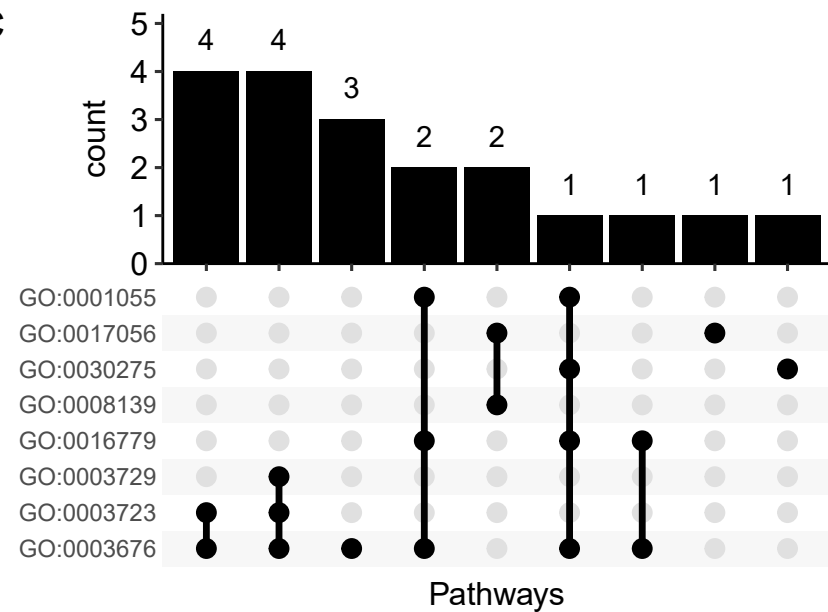

Supplement: Supplementary file 4 [file supplementary]
